# Supplementary material for: An adaptive signaling network in melanoma inflammatory niches confers tolerance to MAPK signaling inhibition
Source: PubMed Central journal article supplement (PMC5460994; doi:10.1084/jem.20160855), 2017-06-05
Supplement: JEM_20160855_sm.pdf [file JEM_20160855_sm.pdf]

SUPPLEMENTAL MATERIAL

Young et al., <https://doi.org/10.1084/jem.20160855>

Table S1. The origin and mutational status of human melanoma cell lines used in this study

| Cell line | Stage         | BRAF  | PTEN                          | NRAS |
|-----------|---------------|-------|-------------------------------|------|
| WM266-4   | MET           | V600D | Homozygous deletion           | WT   |
| WM164     | MET           | V600E | WT                            | WT   |
| A375      | MET           | V600E | WT                            | WT   |
| 888mel    | MET           | V600E | WT                            | WT   |
| WM1361    | VGP           | WT    | WT                            | Q61K |
| WM852     | MET           | WT    | Hemizygous deletion           | Q61R |
| MM485     | MET           | WT    | WT                            | Q61R |
| DO4       | VGP           | WT    | WT                            | Q61L |
| MV3       | RGP           | WT    | Unknown                       | WT   |
| 501mel    | MET           | V600E | WT                            | WT   |
| LU1205    | Xenograft MET | V600E | Hemizygous deletion/Mut W274X | WT   |

Stage of melanoma progression at which biopsies were taken: radial growth phase (RGP), vertical growth phase (VGP), or from either a lymph node or secondary site metastasis (MET). Xenograft metastases were cells passaged in mice to isolate highly metastatic cells. BRAF, phosphatase and tensin homolog (PTEN), and neuroblastoma RAS viral oncogene homolog (NRAS) mutational status is shown.

Table S2. Patient characteristics

| Patient | Mutation | Treatment    | Response/max | Time to progression |
|---------|----------|--------------|--------------|---------------------|
|         |          |              |              | <i>mo</i>           |
| 3       | BRAF     | BRAFi        | SD (–10%)    | 10                  |
| 4       | BRAF     | BRAFi        | PR (–56%)    | 3.5                 |
| 8       | BRAF     | BRAFi + MEKi | PR (–30%)    | 3                   |
| 9       | BRAF     | BRAFi + MEKi | PR (–45%)    | 7                   |
| 11      | BRAF     | BRAFi + MEKi | PR (–80%)    | 10                  |
| 12      | BRAF     | BRAFi + MEKi | PR (–88.9%)  | 12, stopped at 20   |
| 13      | BRAF     | BRAFi + MEKi | PR (–57.9%)  | 9, stroke           |
| 18      | BRAF     | BRAFi + MEKi | SD (–16.5%)  | 6                   |
| 24      | BRAF     | BRAFi        | PR (–53%)    | 2                   |
| 25      | BRAF     | BRAFi + MEKi | PR (–64%)    | 3                   |

Patients with metastatic melanoma all harboring a BRAF<sup>V600E</sup> mutation (confirmed by genotyping) were enrolled on clinical trials for treatment with vemurafenib (BRAFi) or a combination of dabrafenib and trametinib (BRAFi/MEKi). Patient, treatment, maximal response, and duration of response are reported. PR, partial response; SD, stable disease.
